# Supplementary material
Source: Research Square preprint supplement (doi:10.21203/rs.3.rs-8959905/v1)
Supplement: Supplementary file 1 [file 851c9bcb3b0bd6bd72dbf1ea.xlsx]

## Sheet: Folha1
Table S1. List of references included in the meta-analysis with taxonomic information on model organisms (vertebrate ectotherms), origin (w = wild, h = human made: laboratory holding or rearing facilities), habitat and country where the study was conducted. Trophic level is given according to www.fishbase.org and can be interpreted as follows: 2.0 - 2.5 represent herbivorous, 2.5 - 3.0 are omnivo…
Paper_id	Species	Genus	Family	Order	Common name	Origin	Habitat	Developmental stage	Trophic level	Country	doi	Reference
16	Salmo_trutta	Salmo	Salmonidae	Salmoniformes	Brown trout	w	f	larvae	3.1 - 3.2	Germany	10.1038/s41598-019-38800-7	Michl, S. C., Beyer, M., Ratten, J. M., Hasler, M., LaRoche, J., & Schulz, C. (2019). A diet-change modulates the previously established bacterial gut community in juvenile brown trout (Salmo trutta). Scientific reports, 9(1), 2339.
31	Sparus_aurata	Sparus	Sparidae	Acanthuriformes	Gilt-head bream	h	s	juvenile	3.7 - 4.1	Spain	10.1016/j.aquaculture.2022.738362	Piazzon, M. C., Naya-Català, F., Pereira, G. V., Estensoro, I., Del Pozo, R., Calduch-Giner, J. A., ... & Pérez-Sánchez, J. (2022). A novel fish meal-free diet formulation supports proper growth and does not impair intestinal parasite susceptibility in gilthead sea bream (Sparus aurata) with a reshape of gut microbiota and tissue-specific gene expression patterns. Aquaculture, 558, 738362.
62	Salmo_salar	Salmo	Salmonidae	Salmoniformes	Atlantic salmon	h	s	juvenile	3.2 - 4.5	Denmark	10.1128/AEM.02615-16	Gajardo, K., Jaramillo-Torres, A., Kortner, T. M., Merrifield, D. L., Tinsley, J., Bakke, A. M., & Krogdahl, Å. (2017). Alternative protein sources in the diet modulate microbiota and functionality in the distal intestine of Atlantic salmon (Salmo salar). Applied and environmental microbiology, 83(5), e02615-16.
85	Oncorhynchus_mykiss	Oncorhynchus	Salmonidae	Salmoniformes	Rainbow trout	w	f	juvenile	2.9 - 4.4	Italy	10.1186/s12866-023-02990-y	Bruno, A., Sandionigi, A., Panio, A., Rimoldi, S., Orizio, F., Agostinetto, G., ... & Labra, M. (2023). Aquaculture ecosystem microbiome at the water-fish interface: the case-study of rainbow trout fed with Tenebrio molitor novel diets. BMC microbiology, 23(1), 248.
99	Salmo_salar	Salmo	Salmonidae	Salmoniformes	Atlantic salmon	h	f	juvenile	3.2 - 4.5	Norway	10.3354/aei00297	Jin, Y., Angell, I. L., Sandve, S. R., Snipen, L. G., Olsen, Y., & Rudi, K. (2019). Atlantic salmon raised with diets low in long-chain polyunsaturated n-3 fatty acids in freshwater have a Mycoplasma-dominated gut microbiota at sea. Aquaculture Environment Interactions, 11, 31-39.
198	Salmo_salar	Salmo	Salmonidae	Salmoniformes	Atlantic salmon	h	f	juvenile	3.2 - 4.5	Norway	10.1186/s42523-021-00159-4	Li, Y., Gajardo, K., Jaramillo-Torres, A., Kortner, T. M., & Krogdahl, Å. (2022). Consistent changes in the intestinal microbiota of Atlantic salmon fed insect meal diets. Animal Microbiome, 4, 1-15.
273	Oncorhynchus_mykiss	Oncorhynchus	Salmonidae	Salmoniformes	Rainbow trout	h	f	juvenile	2.9 - 4.4	Sweden	10.3389/fmars.2021.728569	Singh, A., Karimi, S., Vidakovic, A., Dicksved, J., Langeland, M., Ferreira, J. A., ... & Lundh, T. (2021). Dietary filamentous fungi and duration of feeding modulates gut microbial composition in rainbow trout (Oncorhynchus mykiss). Frontiers in marine science, 8, 728569.
274	Salmo_salar	Salmo	Salmonidae	Salmoniformes	Atlantic salmon	h	s	juvenile	3.2 - 4.5	Norway	10.1155/2023/5422035	Krogdahl, Å., Chikwati, E. M., Krasnov, A., Dhanasiri, A., Berge, G. M., Aru, V., ... & Kortner, T. M. (2023). Dietary Fish Meal Level and a Package of Choline, β‐Glucan, and Nucleotides Modulate Gut Function, Microbiota, and Health in Atlantic Salmon (Salmo salar, L.). Aquaculture Nutrition, 2023(1), 5422035.
282	Salmo_salar	Salmo	Salmonidae	Salmoniformes	Atlantic salmon	h	s	juvenile	3.2 - 4.5	UK	10.3389/fmicb.2020.589898	Huyben, D., Roehe, B. K., Bekaert, M., Ruyter, B., & Glencross, B. (2020). Dietary lipid: protein ratio and n-3 long-chain polyunsaturated fatty acids alters the gut microbiome of Atlantic salmon under hypoxic and normoxic conditions. Frontiers in Microbiology, 11, 589898.
314	Dicentrarchus_labrax	Dicentrarchus	Moronidae	Acanthuriformes	European seabass	h	s	juvenile	3.8	Spain	10.3389/fmicb.2022.831034	Rangel, F., Enes, P., Gasco, L., Gai, F., Hausmann, B., Berry, D., ... & Pereira, F. C. (2022). Differential modulation of the European sea bass gut microbiota by distinct insect meals. Frontiers in Microbiology, 13, 831034.
335	Osteopilus_septentrionalis	Osteopilus	Hylidae	Anura	Cuban tree frog	w	f	larvae/juvenile		USA	10.1093/icb/icx028	Knutie, S. A., Shea, L. A., Kupselaitis, M., Wilkinson, C. L., Kohl, K. D., & Rohr, J. R. (2017). Early-life diet affects host microbiota and later-life defenses against parasites in frogs. Integrative and comparative biology, 57(4), 732-742.
384	Trachinotus_ovatus	Trachinotus	Trachinotidae	Carangiformes	Pompano	h	s	juvenile	4.2 (adult)	China	10.1016/j.aquaculture.2020.735197	Zhao, W., Xie, J. J., Fang, H. H., Liu, Y. J., Tian, L. X., & Niu, J. (2020). Effects of corn starch level on growth performance, antioxidant capacity, gut morphology and intestinal microflora of juvenile golden pompano, Trachinotus ovatus. Aquaculture, 524, 735197.
401	Aquarana_catesbeiana	Aquarana	Ranidae	Anura	American bullfrog	h	f	larvae		China	10.1016/j.aquaculture.2024.740900	Zhu, B., Zhong, L., Shao, C., Xu, W., Xiang, S., Fu, S., & Hu, Y. (2024). Effects of dietary lipid and protein levels on metamorphosis, growth, metabolism and gut microbiota of tadpole (Lithobates catesbeianus). Aquaculture, 587, 740900.
407	Oreochromis_niloticus	Oreochromis	Cichlidae	Cichliformes	Nile tilapia	h	f	juvenile	2.0 - 2.3	China	10.3390/ani11041024	Yang, C., Jiang, M., Lu, X., & Wen, H. (2021). Effects of dietary protein level on the gut microbiome and nutrient metabolism in tilapia (Oreochromis niloticus). Animals, 11(4), 1024.
431	Siniperca_chuatsi	Siniperca	Cinipercidae	Centrarchiformes	Mandarin fish	h	f	juvenile	4.5	China	10.3389/fmicb.2020.575102	Zhang, Y., Liang, X. F., He, S., Chen, X., Wang, J., Li, J., ... & Alam, M. S. (2020). Effects of high carbohydrate diet-modulated microbiota on gut health in Chinese perch. Frontiers in Microbiology, 11, 575102.
435	Sparus_aurata	Sparus	Sparidae	Acanthuriformes	Gilt-head bream	h	s	juvenile	3.7 - 4.1	Italy	10.1186/s12917-020-02335-1	Rimoldi, S., Gini, E., Koch, J. F. A., Iannini, F., Brambilla, F., & Terova, G. (2020). Effects of hydrolyzed fish protein and autolyzed yeast as substitutes of fishmeal in the gilthead sea bream (Sparus aurata) diet, on fish intestinal microbiome. BMC Veterinary Research, 16(1), 118.
444	Oncorhynchus_mykiss	Oncorhynchus	Salmonidae	Salmoniformes	Rainbow trout	h	f	juvenile	2.9 - 4.4	Germany	10.1038/s41598-023-50071-x	Suhr, M., Fichtner-Grabowski, F. T., Seibel, H., Bang, C., Franke, A., Schulz, C., & Hornburg, S. C. (2023). Effects of plant-based proteins and handling stress on intestinal mucus microbiota in rainbow trout. Scientific Reports, 13(1), 22563.
445	Oncorhynchus_mykiss	Oncorhynchus	Salmonidae	Salmoniformes	Rainbow trout	h	f	juvenile	2.9 - 4.4	China	10.1186/s12866-023-02998-4	Zhang, C., Hu, L., Hao, J., Cai, W., Qin, M., Gao, Q., ... & Ma, R. (2023). Effects of plant-derived protein and rapeseed oil on growth performance and gut microbiomes in rainbow trout. BMC microbiology, 23(1), 255.
494	Salmo_salar	Salmo	Salmonidae	Salmoniformes	Atlantic salmon	h	s	juvenile	3.2 - 4.5	Iceland	10.3920/JIFF2021.0105	Leeper, A., Benhaïm, D., Smárason, B. Ö., Knobloch, S., Òmarsson, K. L., Bonnafoux, T., ... & Øverland, M. (2022). Feeding black soldier fly larvae (Hermetia illucens) reared on organic rest streams alters gut characteristics of Atlantic salmon (Salmo salar). Journal of Insects as Food and Feed, 8(11), 1355-1372.
496	Cyprinus_carpio	Cyprinus	Cyprinidae	Cypriniformes	Common carp	h	f	juvenile	2.1 - 3.1	Netherlands	10.1111/1758-2229.13262	Mes, W., Lücker, S., Jetten, M. S., Siepel, H., Gorissen, M., & van Kessel, M. A. (2024). Feeding strategy and feed protein level affect the gut microbiota of common carp (Cyprinus carpio). Environmental Microbiology Reports, 16(3), e13262.
520	Sparus_aurata	Sparus	Sparidae	Acanthuriformes	Gilt-head bream	h	s	adult	3.7	Spain	10.3390/biology11121744	Naya-Català, F., Piazzon, M. C., Torrecillas, S., Toxqui-Rodríguez, S., Calduch-Giner, J. À., Fontanillas, R., ... & Pérez-Sánchez, J. (2022). Genetics and nutrition drive the gut microbiota succession and host-transcriptome interactions through the gilthead sea bream (Sparus aurata) production cycle. Biology, 11(12), 1744.
525	Dicentrarchus_labrax	Dicentrarchus	Moronidae	Acanthuriformes	European seabass	h	s	juvenile	3.8	Spain	10.1016/j.aquaculture.2023.739639	Torrecillas, S., Rimoldi, S., Montero, D., Serradell, A., Acosta, F., Fontanillas, R., ... & Terova, G. (2023). Genotype x nutrition interactions in European sea bass (Dicentrarchus labrax): effects on gut health and intestinal microbiota. Aquaculture, 574, 739639.
611	Scophthalmus_maximus	Scophthalmus	Scophthalmidae	Carangiformes	Turbot	h	s	juvenile	2.6 - 3.3 (larvae), 4.5 (adults)	China	10.1016/j.aquaculture.2023.739827	Wei, Y., Liu, J., Wang, L., Duan, M., Ma, Q., Xu, H., & Liang, M. (2023). Influence of fish protein hydrolysate on intestinal health and microbial communities in turbot Scophthalmus maximus. Aquaculture, 576, 739827.
621	Ctenopharyngodon_idella	Ctenopharyngodon	Cyprinidae	Cypriniformes	Grass carp	h	f	juvenile	2.0	China	10.1016/j.fsi.2022.11.030	Zhang, Y., Liu, Y., Ma, H., Sun, M., Wang, X., Jin, S., & Yuan, X. (2023). Insufficient or excessive dietary carbohydrates affect gut health through change in gut microbiota and regulation of gene expression of gut epithelial cells in grass carp (Ctenopharyngodon idella). Fish & Shellfish Immunology, 132, 108442.
630	Oncorhynchus_mykiss	Oncorhynchus	Salmonidae	Salmoniformes	Rainbow trout	h	f	juvenile	2.9 - 4.4	Italy	10.1007/s10695-020-00918-1	Rimoldi, S., Antonini, M., Gasco, L., Moroni, F., & Terova, G. (2021). Intestinal microbial communities of rainbow trout (Oncorhynchus mykiss) may be improved by feeding a Hermetia illucens meal/low-fishmeal diet. Fish physiology and biochemistry, 47(2), 365-380.
661	Danio_rerio	Danio	Cyprinidae	Cypriniformes	Zebrafish	h	f	juvenile	2.8 - 3.4	USA	10.1016/j.mimet.2017.01.016	Koo, H., Hakim, J. A., Powell, M. L., Kumar, R., Eipers, P. G., Morrow, C. D., ... & Bej, A. K. (2017). Metagenomics approach to the study of the gut microbiome structure and function in zebrafish Danio rerio fed with gluten formulated diet. Journal of Microbiological Methods, 135, 69-76.
687	Salmo_salar	Salmo	Salmonidae	Salmoniformes	Atlantic salmon	h	f	juvenile	3.2 - 4.5	Norway	10.1186/s42523-021-00161-w	Weththasinghe, P., Rocha, S. D., Øyås, O., Lagos, L., Hansen, J. Ø., Mydland, L. T., & Øverland, M. (2022). Modulation of Atlantic salmon (Salmo salar) gut microbiota composition and predicted metabolic capacity by feeding diets with processed black soldier fly (Hermetia illucens) larvae meals and fractions. Animal Microbiome, 4(1), 9.
688	Salmo_salar	Salmo	Salmonidae	Salmoniformes	Atlantic salmon	h	s	juvenile	3.2 - 4.5	Norway	10.1186/s42523-024-00321-8	Tawfik, M. M., Lorgen-Ritchie, M., Król, E., McMillan, S., Norambuena, F., Bolnick, D. I., ... & Martin, S. A. (2024). Modulation of gut microbiota composition and predicted metabolic capacity after nutritional programming with a plant-rich diet in Atlantic salmon (Salmo salar): insights across developmental stages. Animal Microbiome, 6(1), 38.
704	Oncorhynchus_mykiss	Oncorhynchus	Salmonidae	Salmoniformes	Rainbow trout	h	f	juvenile	2.9 - 4.4	Italy	10.1371/journal.pone.0193652	Rimoldi, S., Terova, G., Ascione, C., Giannico, R., & Brambilla, F. (2018). Next generation sequencing for gut microbiome characterization in rainbow trout (Oncorhynchus mykiss) fed animal by-product meals as an alternative to fishmeal protein sources. PLoS One, 13(3), e0193652.
780	Oncorhynchus_mykiss	Oncorhynchus	Salmonidae	Salmoniformes	Rainbow trout	h	f	juvenile	2.9 - 4.4	France	10.1186/s42523-021-00107-2	Pérez-Pascual, D., Pérez-Cobas, A. E., Rigaudeau, D., Rochat, T., Bernardet, J. F., Skiba-Cassy, S., ... & Ghigo, J. M. (2021). Sustainable plant-based diets promote rainbow trout gut microbiota richness and do not alter resistance to bacterial infection. Animal microbiome, 3(1), 47.
786	Gadus_morhua	Gadus	Gadidae	Gadiformes	Atlantic cod	h	s	juvenile	3.2 - 4.4	Ireland	10.1186/s42523-020-00065-1	Keating, C., Bolton-Warberg, M., Hinchcliffe, J., Davies, R., Whelan, S., Wan, A. H. L., ... & Smith, C. J. (2021). Temporal changes in the gut microbiota in farmed Atlantic cod (Gadus morhua) outweigh the response to diet supplementation with macroalgae. Animal Microbiome, 3(1), 7.
796	Clarias_gariepinus	Clarias	Clariidae	Siluriformes	African sharptooth catfish	h	f	juvenile	3.3 - 4.4	Germany	10.3390/life11060558	Rosenau, S., Oertel, E., Mott, A. C., & Tetens, J. (2021). The effect of a total fishmeal replacement by Arthrospira platensis on the microbiome of african catfish (Clarias gariepinus). Life, 11(6), 558.
818	Sparus_aurata	Sparus	Sparidae	Acanthuriformes	Gilt-head bream	h	s	juvenile	3.7 - 4.1	Italy	10.1007/s10695-024-01314-9	Rimoldi, S., Di Rosa, A. R., Oteri, M., Chiofalo, B., Hasan, I., Saroglia, M., & Terova, G. (2024). The impact of diets containing Hermetia illucens meal on the growth, intestinal health, and microbiota of gilthead seabream (Sparus aurata). Fish Physiology and Biochemistry, 50(3), 1003-1024.
822	Ctenopharyngodon_idella	Ctenopharyngodon	Cyprinidae	Cypriniformes	Grass carp	h	f	juvenile	2.0	China	10.1111/are.13312	Zhang, J., Xiong, F., Wang, G. T., Li, W. X., Li, M., Zou, H., & Wu, S. G. (2017). The influence of diet on the grass carp intestinal microbiota and bile acids. Aquaculture Research, 48(9), 4934-4944.
829	Oncorhynchus_mykiss	Oncorhynchus	Salmonidae	Salmoniformes	Rainbow trout	h	f	juvenile	2.9 - 4.4	Germany	10.1371/journal.pone.0177735	Michl, S. C., Ratten, J. M., Beyer, M., Hasler, M., LaRoche, J., & Schulz, C. (2017). The malleable gut microbiome of juvenile rainbow trout (Oncorhynchus mykiss): Diet-dependent shifts of bacterial community structures. PloS one, 12(5), e0177735.
832	Oncorhynchus_mykiss	Oncorhynchus	Salmonidae	Salmoniformes	Rainbow trout	h	f	juvenile	2.9 - 4.4	Germany	10.1186/s42523-023-00253-9	Suhr, M., Fichtner-Grabowski, F. T., Seibel, H., Bang, C., Franke, A., Schulz, C., & Hornburg, S. C. (2023). The microbiota knows: handling-stress and diet transform the microbial landscape in the gut content of rainbow trout in RAS. Animal microbiome, 5(1), 33.
unpublished	Rana_temporaria	Rana	Ranidae	Anura	European common frog	w	f	larvae		Germany	10.32942/X2CW81
*Jia, Y., Jiang, Y., Liu, Y., Sui, X., Feng, X., Zhu, R., & Chen, Y. (2021). Understanding trophic structure variation in fish assemblages of subtropical shallow lakes: Combined effects of ecosystem size, productivity, and disturbance. Ecological Indicators, 129, 107924. (doi: 0.1016/j.ecolind.2021.107924)
